# Supplementary material
Source: PubMed Central journal article supplement (PMC1679897)
Supplement: rspb20063628s09.pdf [file rspb20063628s09.pdf]

## Supplementary information

Appendix of original (numbered) references cited for calculation of effect sizes in Ewen et al. (2004). Highlighted (yellow) references correspond with citations in Figure 1 of the current manuscript.

1. Albrecht, D. J. 2000 Sex ratio manipulation within broods of house wrens, *Troglodytes aedon*. *Anim. Behav.* **59**, 1227–1234.
2. Albrecht, D. J. & Johnson, L. S. 2002 Manipulation of offspring sex ratio by second-mated female house wrens. *Proc. R. Soc. Lond. B* **269**, 461–465.
3. Alonso-Alvarez, C. & Velando, A. 2003 Female body condition and brood sex ratio in yellow-legged gulls *Larus cachinnans*. *Ibis* **145**, 220–226.
4. Appleby, B. M., Petty, S. J., Blakey, J. K., Rainey, P. & Macdonald, D. W. 1997 Does variation of sex ratio enhance reproductive success of offspring in tawny owls *Strix aluco*? *Proc. R. Soc. Lond. B* **264**, 1111–1116. (DOI 10.1098/rspb.2001.1914.)
5. Arnold, K. E., Griffith, S. C. & Goldizen, A. W. 2001 Sex-biased hatching sequences in the cooperatively breeding noisy miner. *J. Avian Biol.* **32**, 219–223.
6. Badyaev, A. V., Hill, G. E., Beck, M. L., Dervan, A. A., Duckworth, R. A., McGraw, K. J., Nolan, P. M. & Whittingham, L. A. 2002 Sex-biased hatching order and adaptive population divergence in a passerine bird. *Science* **295**, 316–318.
7. Blanco, G., Davila, J. A., Lopez Septiem, J. A., Rodriguez, R. & Martinez, F. 2002 Sexbiased initial eggs favours sons in the slightly size-dimorphic Scops owl (*Otus scops*). *Biol. J. Linn. Soc.* **76**, 1–7.
8. Bradbury, R. B. & Blakey, J. K. 1998 Diet, maternal condition, and offspring sex ratio in the zebra finch, *Poephila guttata*. *Proc. R. Soc. Lond. B* **265**, 895–899. (DOI 10.1098/rspb.1998.0375.)
9. Byholm, P., Ranta, E., Kaitala, V., Lindén, H., Saurola, P. & Wikman, M. 2002 Resource availability and goshawk offspring sex ratio variation: a large-scale ecological phenomenon. *J. Anim. Ecol.* **71**, 994–1001.
10. Clarke, M. F., Jones, D. A., Ewen, J. G., Robertson, R. J., Griffiths, R., Painter, J., Boag, P. T. & Crozier, R. 2002 Male-biased sex ratios in broods of the cooperatively breeding bell miner *Manorina melanophrys*. *J. Avian Biol.* **33**, 71–76.
11. Clotfelter, E. D. 1996 Mechanisms of facultative sex-ratio variation in zebra finches (*Taeniopygia guttata*). *Auk* **113**, 441–449.
12. Clout, M. N., Elliott, G. P. & Robertson, B. C. 2002 Effects of supplementary feeding on the offspring sex ratio of kakapo: a dilemma for the conservation of a polygynous parrot. *Biol. Cons.* **107**, 13–18.
13. Cooch, E., Lank, D., Robertson, R. & Cooke, F. 1997 Effects of parental age and environmental change on offspring sex ratio in a precocial bird. *J. Anim. Ecol.* **66**, 189–202.
14. Cordero, P. J., Vinuela, J., Aparicio, J. M. & Veiga, J. P. 2001 Seasonal variation in sex ratio and sexual egg dimorphism favoring daughters in first clutches of the spotless starling. *J. Evol. Biol.* **14**, 829–834.
15. Ewen, J. G., Crozier, R. H., Cassey, P., Ward-Smith, T., Painter, J., Robertson, R. J., Jones, D. A. & Clarke, M. F. 2003 Facultative control of offspring sex in the cooperatively breeding bell miner, *Manorina melanophrys*. *Behav. Ecol.* **14**, 157–164.
16. Green, D. J. 2002 Pair bond duration influences paternal provisioning and the primary sex ratio of brown thornbill broods. *Anim. Behav.* **64**, 791–800.
17. Hartley, I. R., Griffith, S. C., Wilson, K., Shepherd, M. & Burke, T. 1999 Nestling sex ratios in the polygynously breeding Corn Bunting, *Miliaria calandra*. *J. Avian Biol.* **30**, 7–14.
18. Heinsohn, R., Legge, S. & Barry, S. 1997 Extreme bias in sex allocation in *Eclectus* parrots. *Proc. R. Soc. Lond. B.* **264**, 1325–1329. (DOI 10.1098/rspb.1997.0183.)

19. Kasumovic, M. M., Gibbs, H. L., Woolfenden, B. E., Sealy, S. G. & Nakamura, H. 2002 Primary sex-ratio in two brood parasite birds: brown headed cowbird (*Molothrus ater*) and common cuckoo (*Cuculus canorus*). *Auk* **119**, 561–566.
20. Kilner, R. 1998 Primary and secondary sex ratio manipulation by zebra finches. *Anim. Behav.* **56**, 155–164.
21. Kolliker, M., Heeb, P., Werner, I., Mateman, A. C., Lessells, C. M. & Richner, H. 1999 Offspring sex ratio is related to male body size in the great tit (*Parus major*). *Behav. Ecol.* **10**, 68–72.
22. Komdeur, J. 1996 Facultative sex ratio bias in the offspring of Seychelles warblers. *Proc. R. Soc. Lond. B.* **263**, 661–666.
23. Komdeur, J., Magrath, M. J. L. & Krackow, S. 2002 Pre-ovulation control of hatching sex ratio in the Seychelles warbler. *Proc. R. Soc. Lond. B* **269**, 1067–1072. (DOI 10.1098/rspb.2002.1965.)
24. Korpimäki, E., May, C. A., Parkin, D. T., Wetton, J. H. & Wiehn, J. 2000 Environmental- and parental condition-related variation in sex ratio of kestrel broods. *J. Avian Biol.* **31**, 128–134.
25. Krebs, E. A., Green, D. J., Double, M. C. & Griffiths, R. 2002 Laying date and laying sequence influence the sex ratio of crimson rosella broods. *Behav. Ecol. Sociobiol.* **51**, 447–454.
26. Leech, D. I., Hartley, I. R., Stewart, I. R. K., Griffith, S. C. & Burke, T. 2001 No effect of parental quality or extrapair paternity on brood sex ratio in the blue tit (*Parus caeruleus*). *Behav. Ecol.* **12**, 674–680.
27. Legge, S., Heinsohn, R., Double, M. C., Griffiths, R. & Cockburn, A. 2001 Complex sex allocation in the laughing kookaburra. *Behav. Ecol.* **12**, 524–533.
28. Lessells, C. M., Mateman, A. C. & Visser, J. 1996 Great tit hatchling sex ratios. *J. Avian Biol.* **27**, 135–142.
29. Nager, R. G., Monaghan, P., Griffiths, R., Houston, D. C. & Dawson, R. 1999 Experimental demonstration that offspring sex ratio varies with maternal condition. *Proc. Natl. Acad. Sci. USA* **96**, 570–573.
30. Nager, R. G., Monaghan, P., Houston, D. C. & Genovart, M. 2000 Parental condition, brood sex ratio and differential young survival: an experimental study in gulls (*Larus fuscus*). *Behav. Ecol. Sociobiol.* **48**, 452–457.
31. Nishiumi, I. 1998 Brood sex ratio is dependent on female mating status in polygynous great reed warblers. *Behav. Ecol. Sociobiol.* **44**, 9–14.
32. Questiau, S., Escaravage, N., Eybert, M.-C. & Taberlet, P. 2000 Nestling sex ratios in a population of bluethroats *Luscinia svecica* inferred from AFLPTM analysis. *J. Avian Biol.* **31**, 8–14.
33. South, J. M. & Wright, T. F. 2002 Nestling sex ratios in the yellow-naped amazon: no evidence for adaptive modification. *Condor* **104**, 437–440.
34. Svensson, E. & Nilsson, J. 1996 Mate quality affects offspring sex ratio in blue tits. *Proc. R. Soc. Lond. B* **263**, 357–361.
35. Velando, A. 2002 Experimental manipulation of maternal effort produces differential effects in sons and daughters: implications for adaptive sex ratios in the blue-footed booby. *Behav. Ecol.* **13**, 443–449.
36. Velando, A., Graves, J. & Ortega-Ruano, J. E. 2002 Sex ratio in relation to timing of breeding, and laying sequence in a dimorphic seabird. *Ibis* **144**, 9–16.
37. Verboven, N., Kakela, M. & Orell, M. 2002 Absence of seasonal variation in great tit offspring sex ratios. *J. Avian Biol.* **33**, 138–142.
38. Westerdahl, H., Bensch, S., Hansson, B., Hasselquist, D. & Von Schantz, T. 1997 Sex ratio variation among broods of great reed warblers *Acrocephalus arundinaceus*. *Mol. Ecol.* **6**, 543–548.
39. Westneat, D. F., Stewart, I. R. K., Woeste, E. H., Gipson, J., Abdulkadir, L. & Poston, J. P. 2002 Patterns of sex ratio variation in house sparrows. *Condor* **104**, 598–609.
40. Whittingham, L. A. & Dunn, P. O. 2000 Offspring sex ratios in tree swallows: females in better condition produce more sons. *Mol. Ecol.* **9**, 1123–1129.
